# Supplementary material
Source: publisher site journal article supplement (https://www.dovepress.com/get_supplementary_file.php?f=299892.docx)
Supplement: Supplementary file 1 [file get_supplementary_file.php]

**Supplemental table**

**Table S1 Clinical characteristics of patients diagnosed as PM-DILI from retrospective cohort**

| **Characteristic** | **PM-DILI (n=21)** |
| --- | --- |
| **Age**, year, median | 45 (38, 53) |
| **Female**, n (%) | 14 (66.7) |
| **Time on PM prior DILI**, days | 31 (31, 62) |
| **ALT**, U/L | 1142±557 |
| **AST**, U/L | 878±394 |
| **ALP**, U/L | 191±96 |
| **TBIL**, μmol/L | 144±94 |
| **Injury Type**, n (%) |  |
| Hepatocellular | 19 (90.4) |
| Cholestatic | 1 (4.8) |
| Mixed | 1 (4.8) |
| **Time of hospitalization**, days, median | 21 (13, 25) |

**Table S2 Comparisons on serum cytokines between Subset 1 (PM-DILI/at injury) and** **Subset 6 (PM-Tolerant/at pre-dosing).**

| **Content** | **PM-DILI/at injury**  (Subset 1, n=10) | **PM-Tolerant/at pre-dosing**  (Subset 6, n=12) | ***P*** |
| --- | --- | --- | --- |
| CCL2 (MCP-1) | 657.41±300.66 | 256.47±109.65 | 0.001 |
| CCL3 (MIP-1α) | 14.00±24.97 | 7.26±10.75 | 0.433 |
| CCL11 (Eotaxin) | 513.41±349.73 | 206.39±88.51 | 0.011 |
| CX3CL1 (Fractalkine) | 184.73±56.69 | 261.80±76.62 | 0.027 |
| CXCL1 (GRO-α) | 1500.37±377.66 | 962.25±389.80 | 0.006 |
| CXCL10 (IP-10) | 2434.38±1242.24 | 973.74±274.34 | 0.002 |
| EGF | 195.77±117.59 | 101.80±60.71 | 0.034 |
| G-CSF | 99.01±172.76 | 31.32±11.40 | 0.212 |
| GM-CSF | 15.31±13.21 | 25.86±23.80 | 0.262 |
| IFN-γ | 49.34±60.38 | 8.63±3.90 | 0.038 |
| IL-1α | 0.99±2.66 | 2.43±6.66 | 0.571 |
| IL-1β | 0.55±0.58 | 2.06±2.51 | 0.102 |
| IL-2 | 1.72±3.78 | 0.50±1.20 | 0.453 |
| IL-5 | 0.92±1.24 | 1.19±1.00 | 0.601 |
| IL-6 | 2.05±2.65 | 3.52±7.04 | 0.572 |
| IL-10 | 33.23±34.69 | 1.91±5.78 | 0.013 |
| IL-12 | 11.58±27.48 | 8.22±10.37 | 0.715 |
| IL-17α | 35.77±98.06 | 3.22±3.61 | 0.286 |
| TNF-α | 22.10±14.64 | 7.48±2.88 | 0.004 |
| VEGF | 524.19±117.15 | 309.93±82.00 | 0.001 |

**Table S3 The serum cytokines characteristic of the replication study**

| **Content** | **PM-tolerant**  **(Sub 7, n=13)** | **PM-DILI**  **(Sub 2, n=11)** | **PM-recovery**  **(Sub 3, n=11)** | ***P*** ***valve***  **(sub 2 vs sub 7)** | ***P*** ***valve***  **(sub 3 vs sub 7)** |
| --- | --- | --- | --- | --- | --- |
| CCL2/MCP-1 | 250.67±87.04 | 691.83±415.36 | 750.27±508.69 | 0.003 | 0.021 |
| CCL3/MIP-1α | 1.47±3.32 | 12.59±20.2 | 3.42±5.68 | 0.075 | 0.423 |
| CCL11/Eotaxin | 193.07±94.62 | 405.62±230.4 | 497.25±298.31 | 0.015 | 0.022 |
| CX3CL1/Fractalkine | 227.96±93.45 | 137.86±90.54 | 137.05±86.42 | 0.036 | 0.012 |
| CXCL1/GRO-α | 1047.49±414.24 | 1464.53±354.42 | 1249.53±718.43 | 0.027 | 0.523 |
| CXCL10/IP-10 | 1134.67±347.66 | 2340.41±443.5 | 2893.32±1419.42 | 0.015 | 0.002 |
| EGF | 66.69±30.9 | 198.46±198.16 | 112.75±88.2 | 0.043 | 0.276 |
| G-CSF | 32.06±22.02 | 48.07±44.34 | 36.69±42.16 | 0.285 | 0.800 |
| GM-CSF | 22.05±25.95 | 13.73±22.82 | 18.99±24.79 | 0.437 | 0.781 |
| IFN-γ | 3.83±1.62 | 19.68±24.26 | 11.28±11.63 | 0.044 | 0.136 |
| IL-1α | 25.47±39.22 | 57.32±146.04 | 0.13±1.51 | 0.478 | 0.052 |
| IL-1β | 0.83±0.88 | 0.43±0.74 | 0.66±0.90 | 0.262 | 0.657 |
| IL-2 | 3.84±12.35 | 0.25±0.47 | 0.58±9.26 | 0.367 | 0.413 |
| IL-5 | 0.63±0.39 | 0.70±0.51 | 4.33±5.42 | 0.751 | 0.104 |
| IL-6 | 1.52±2.13 | 2.44±2.72 | 1.15±1.65 | 0.380 | 0.605 |
| IL-10 | 2.53±5.71 | 143.19±208.62 | 12.52±19.97 | 0.031 | 0.240 |
| IL-12 | 4.89±7.46 | 10.12±17.38 | 6.37±8.38 | 0.357 | 0.684 |
| IL-17α | 5.76±8.62 | 12.82±25.22 | 11.31±6.16 | 0.375 | 0.425 |
| TNF-α | 8.51±3.89 | 21.82±18.75 | 18.91±0.98 | 0.026 | 0.029 |
| VEGF | 190.63±103.69 | 377.33±191.84 | 297.62±119.66 | 0.008 | 0.034 |

**Table S4 Performance of the single-cytokine predicting models for susceptible individuals of PM-DILI**

| **Cytokinesc** | **Cut off**  **(pg/ml)** | **>cut off cases** | | **TPR**  **(A1, %)** | **FPR**  **(A2 %)** | **R(A1/A2)** | **Odds Ratio**  **(95% CI)** |
| --- | --- | --- | --- | --- | --- | --- | --- |
| **PM-DILI**  **（n=21）** | **PM-Tolerant**  **（n=25）** |
| **CCL2(MCP-1)** | 312 | 18（21） | 6（25） | 85.71 | 24.00 | 3.57 | 19.00(4.12-87.62) |
| **TNF-α** | 9.57 | 18（21） | 7（25） | 85.71 | 28.00 | 3.06 | 15.43(3.44-69.29) |
| **VEGF** | 435 | 7（21） | 2（25） | 33.33 | 8.00 | 4.17 | 5.75 (1.04-31.67) |
| **CX3CL1(Fractalkine)** | 170 | 12（21） | 6（25） | 57.14 | 24.00 | 2.38 | 4.22 (1.20-14.90) |
| **CCL11(Eotaxin)** | 238 | 13（21） | 7（25） | 61.90 | 28.00 | 2.21 | 4.18 (1.21-14.44) |
| **CXCL10(IP-10)** | 174 | 9（21） | 4（25） | 42.86 | 16.00 | 2.68 | 3.94 (1.00-15.57) |

TPR: True positive rate; FPR: False positive rate.

**Table S5 Performance of the duo-cytokine panel predicting models for susceptible individuals of PM-DILI**

| **Cytokine** | **Combin-ation** | **Cytokine** | **>cut off cases** | | **TPR**  **(A1, %)** | **FPR**  **(A2, %)** | **R(A1/A2)** | **Odds Ratio**  **(95% CI)** |
| --- | --- | --- | --- | --- | --- | --- | --- | --- |
| **PM-DILI**  **（n=21）** | **PM-Tolerant（n=25）** |
| **CCL2** | *and* | **TNF-α** | 16（21） | 3（25） | 76.19 | 14.29 | 6.35 | 23.47(4.88-112.75) |
| **CCL2** | *or* | **VEGF** | 20（21） | 7（25） | 95.24 | 28.00 | 3.40 | 51.43(5.76-459.50) |
| **TNF-α** | *or* | **VEGF** | 20（21） | 8（25） | 95.24 | 32.00 | 2.98 | 42.50(4.82-374.89) |
| **TNF-α** | *or* | **CXCL10** | 20（21） | 9（25） | 95.24 | 36.00 | 2.65 | 35.56(4.07-310.81) |
| **CCL2** | *or* | **CXCL10** | 20（21） | 9（25） | 95.24 | 36.00 | 2.65 | 35.56(4.07-310.81) |
| **CCL2** | *or* | **TNF-α** | 20（21） | 10（25） | 95.24 | 40.00 | 2.38 | 30.00(3.45-260.64) |

1 The logical operator “and” means the two cytokines should meet their cutoff criteria simultaneously to return a valid input of the model. The logical operator “or” means any one of the two cytokines met their cutoff criteria will return a valid input of the model.

2 The cutoff values of each cytokines were the same in single-cytokine models (Table S4).

**Table S6 Performance of the tri-cytokine panel predicting models for susceptible individuals of PM-DILI**

| **Cytokine**  **panel** | **Combi-nation** | **Cytokine** | **>cut off cases** | | **TPR**  **(A1, %)** | **FPR**  **(A2, %)** | **R(A1/A2)** | **Odds Ratio**  **(95% CI)** |
| --- | --- | --- | --- | --- | --- | --- | --- | --- |
| **PM-DILI**  **（n=21）** | **PM-Tolerant（n=25）** |
| CCL2 *and* TNF-α | *or* | VEGF | 20（21） | 4（25） | 95.24 | 16 | 5.95 | 105(10.79-1021.74) |
| *or* | CXCL10 | 20（21） | 6（25） | 95.24 | 24 | 3.97 | 63.33(7.00-576.30) |

1 The logical operator “and” means the two cytokines should meet their cutoff criteria simultaneously to return a valid input of the model. The logical operator “or” means any one of the two cytokines met their cutoff criteria will return a valid input of the model.

2 The cutoff values of each cytokines were the same in single-cytokine models (Table S4).
